# Supplementary material
Source: Springer Nature journal article supplement (https://www.springermedizin.de/resource/supplementary/12884_2011_483_MOESM11_ESM.pdf/9457918)

## WHO CRITERIA

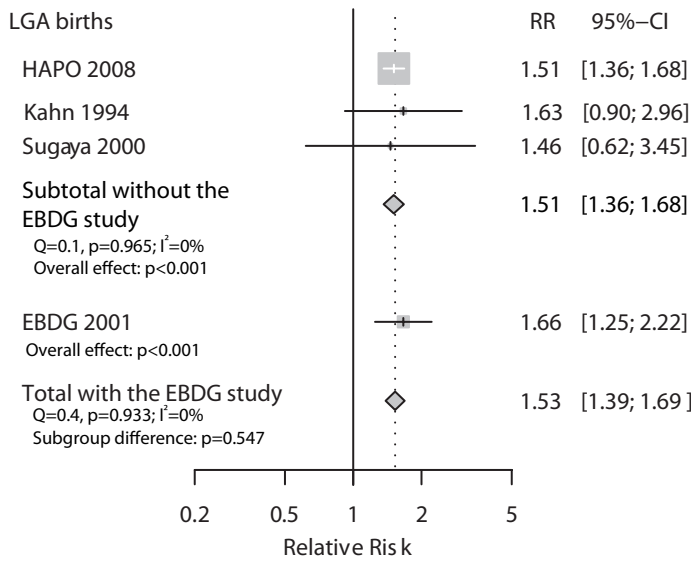

## IADPSG CRITERIA

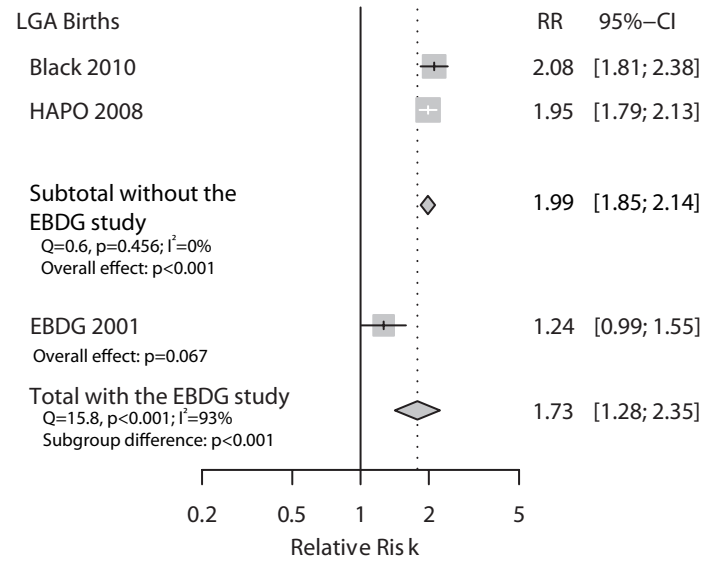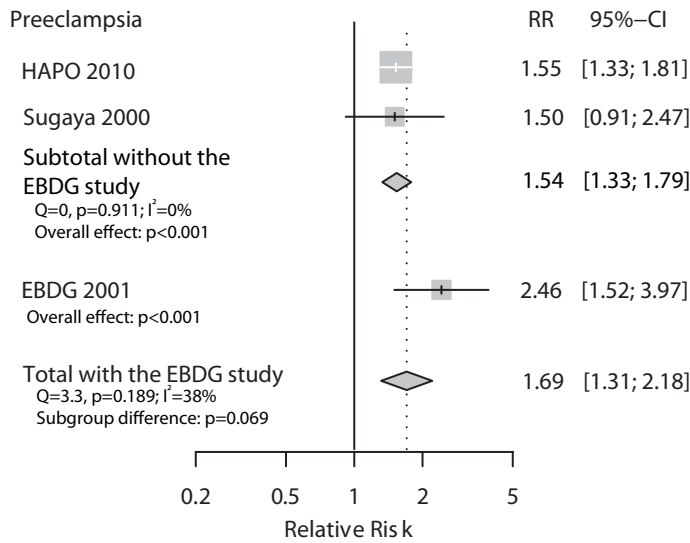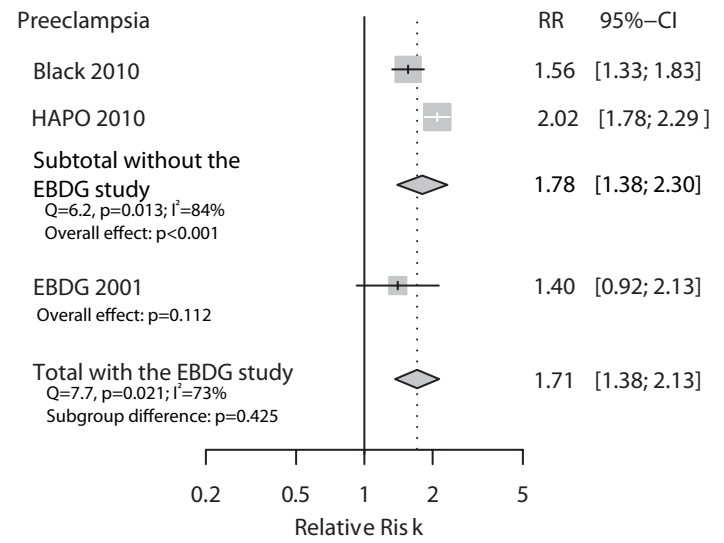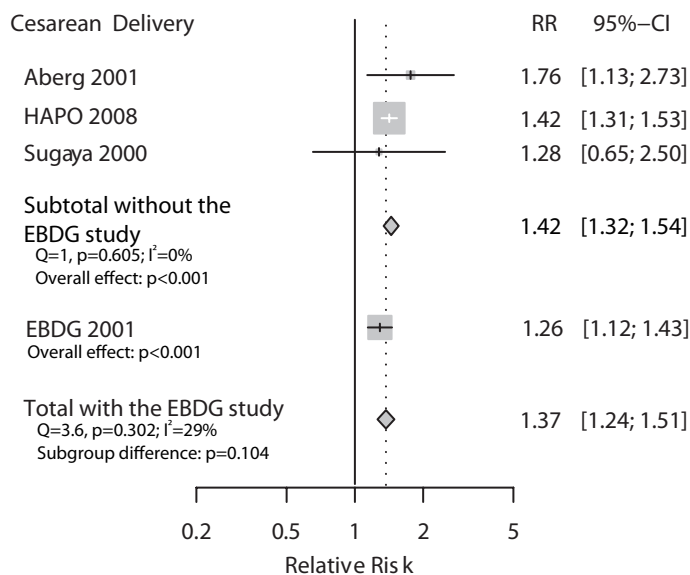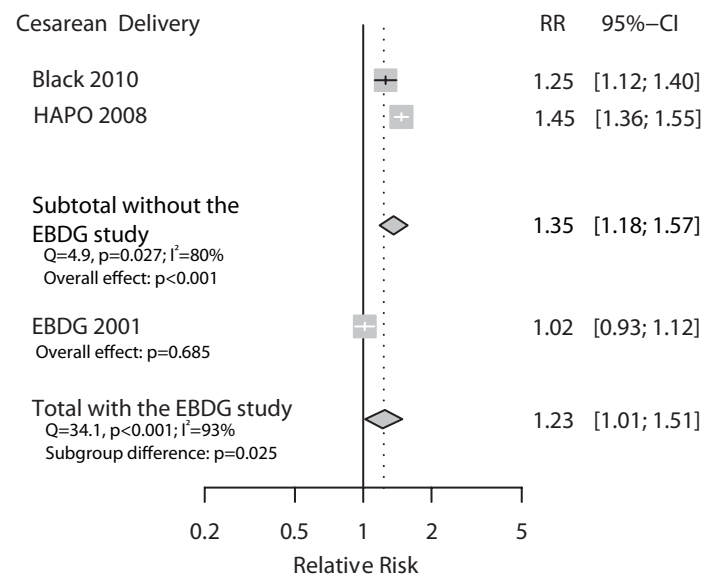

Supplement: MOESM11 [file 9457918]
